# Supplementary material
Source: PubMed Central journal article supplement (PMC2784173)

**A**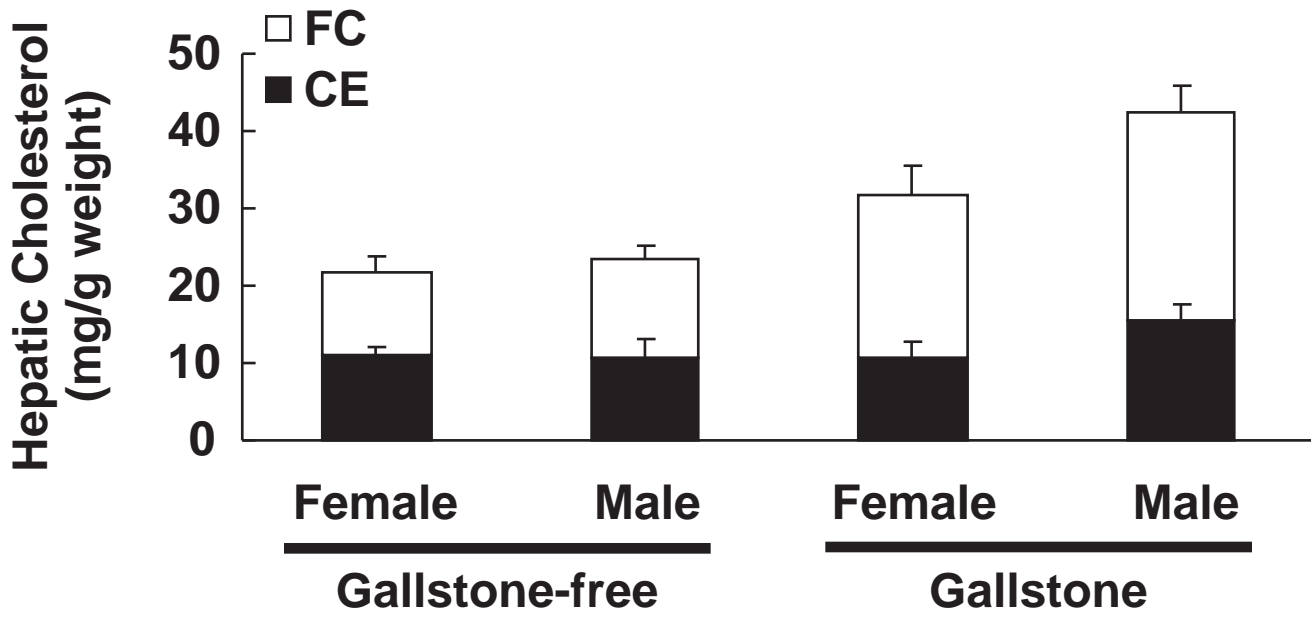**B**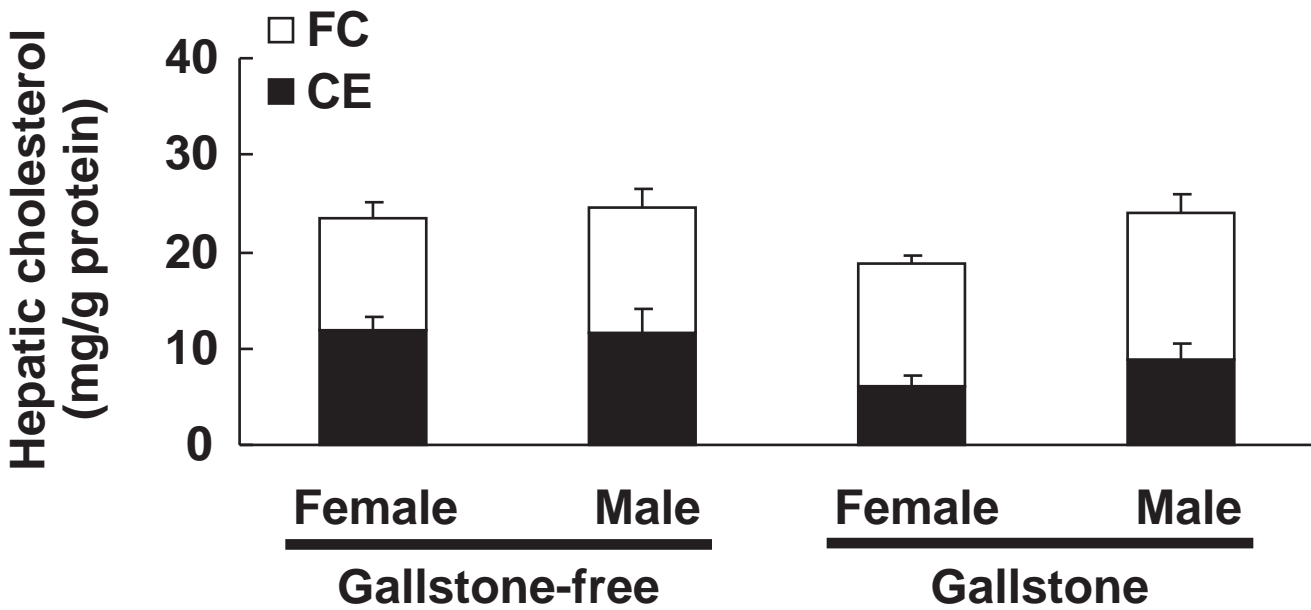**Figure 1S**

Supplement: NIHMS111537-supplement-01.pdf [file NIHMS111537-supplement-01.pdf]

**A**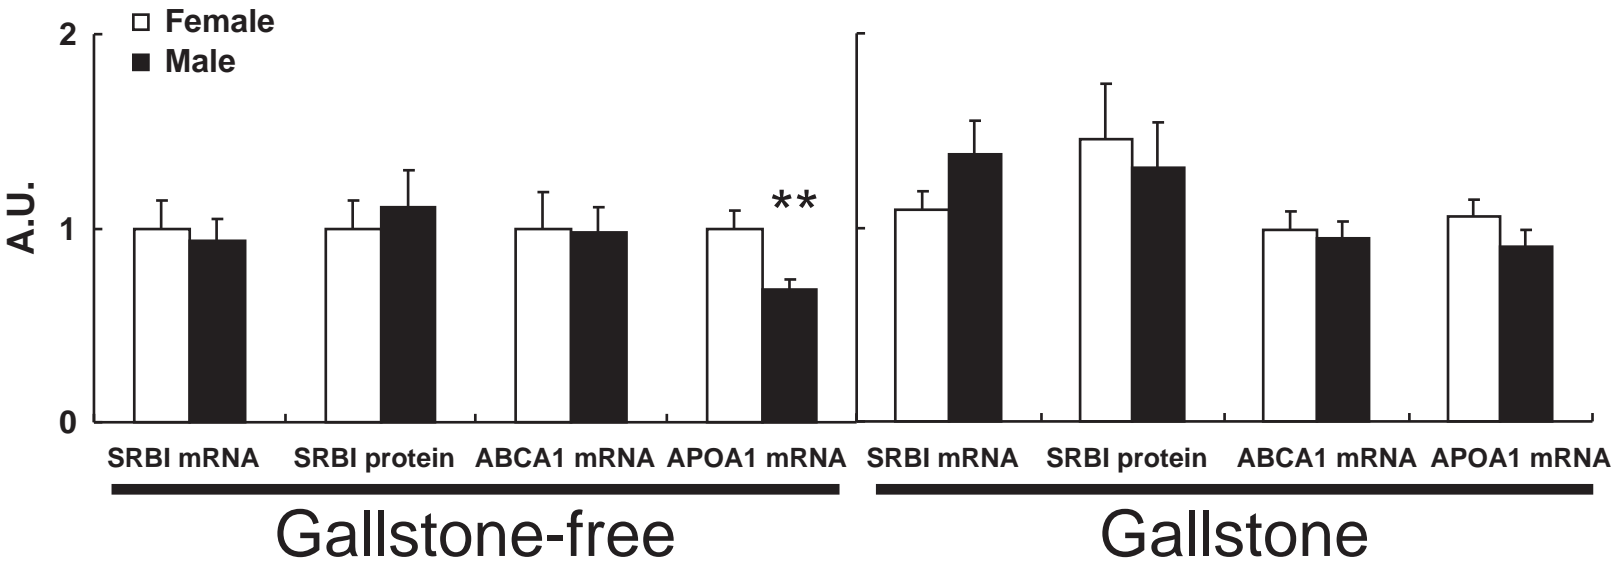**B**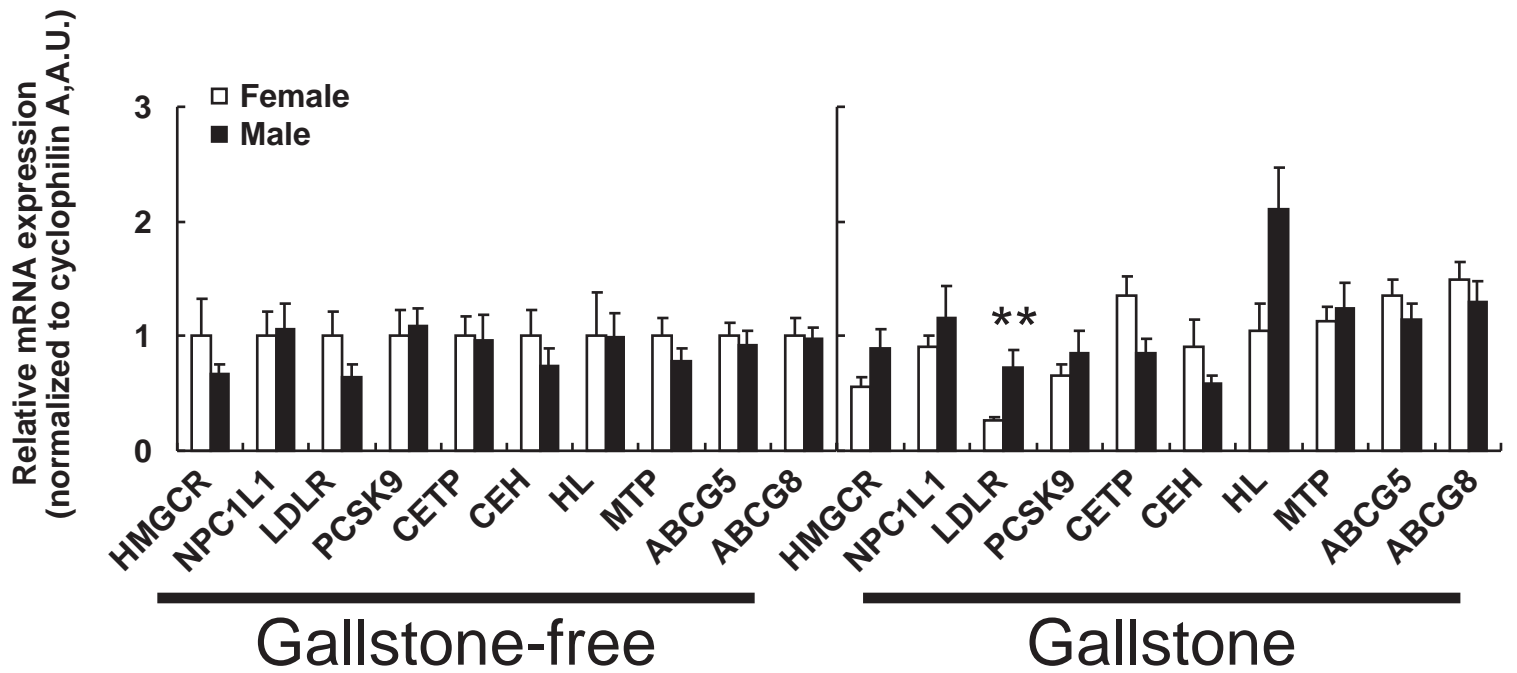**Figure S2**

Supplement: NIHMS111537-supplement-02.pdf [file NIHMS111537-supplement-02.pdf]
